# Supplementary material for: In Situ Monitoring of Drug Precipitation from Digesting Lipid Formulations Using Low-Frequency Raman Scattering Spectroscopy
Source: MDPI journal article supplement (doi:10.3390/pharmaceutics15071968), 2023-07-17
Supplement: s1 [file s1]

# In Situ Monitoring of Drug Precipitation from Digesting Lipid Formulations Using Low-Frequency Raman Scattering Spectroscopy

Malinda Salim <sup>1,†</sup>, Sara J. Fraser-Miller <sup>2,†</sup>, Kārlis Bērziņš <sup>2,3</sup>, Joshua J. Sutton <sup>2</sup>, Keith C. Gordon <sup>2</sup> and Ben J. Boyd <sup>1,3,\*</sup>

<sup>1</sup> Drug Delivery, Disposition and Dynamics, Monash Institute of Pharmaceutical Sciences, Monash University (Parkville Campus), 381 Royal Parade, Parkville, VIC 3052, Australia; malinda.salim@monash.edu

<sup>2</sup> Te Whai Ao-Dodd-Walls Centre for Photonic and Quantum Technologies, Department of Chemistry, University of Otago, Dunedin 9016, New Zealand; sara.miller@otago.ac.nz (S.J.F.-M.); karlis.berzins@sund.ku.dk (K.B.); j.sutton94@protonmail.com (J.J.S.); keith.gordon@otago.ac.nz (K.C.G.)

<sup>3</sup> Department of Pharmacy, University of Copenhagen, Universitetsparken 2, 2100 Copenhagen, Denmark

\* Correspondence: ben.boyd@monash.edu; Tel.: +61-3-99039112; Fax: +61-3-99039583

† These authors contributed equally to this work.

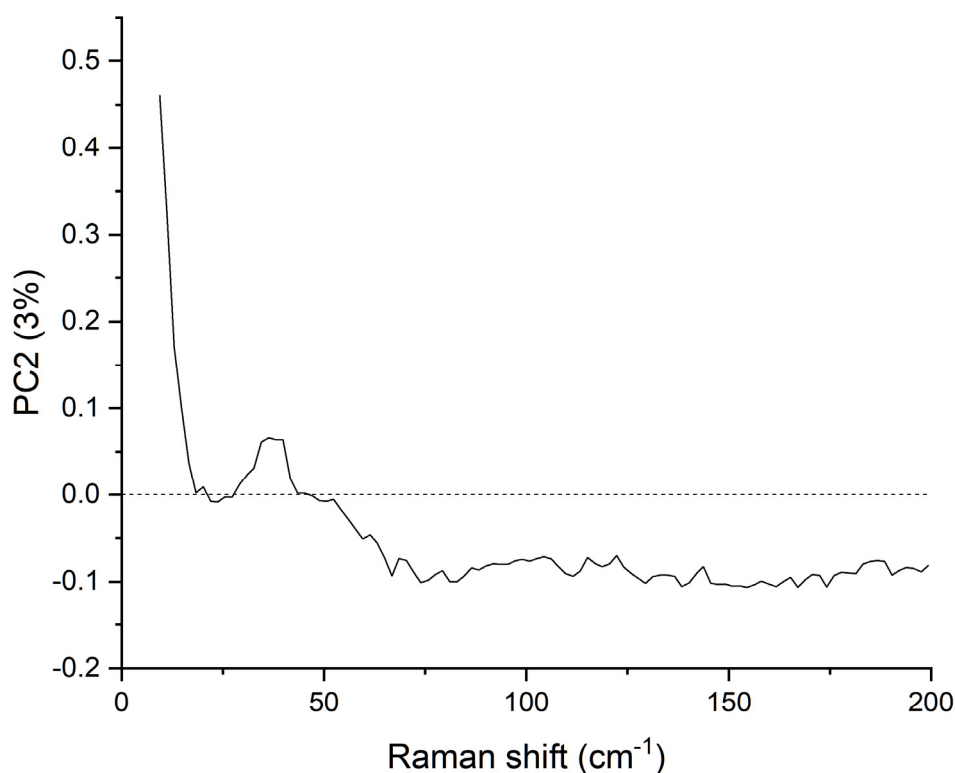

**Figure S1.** Loadings plot for PC2 based on the low-frequency region (8-200 cm<sup>-1</sup>).

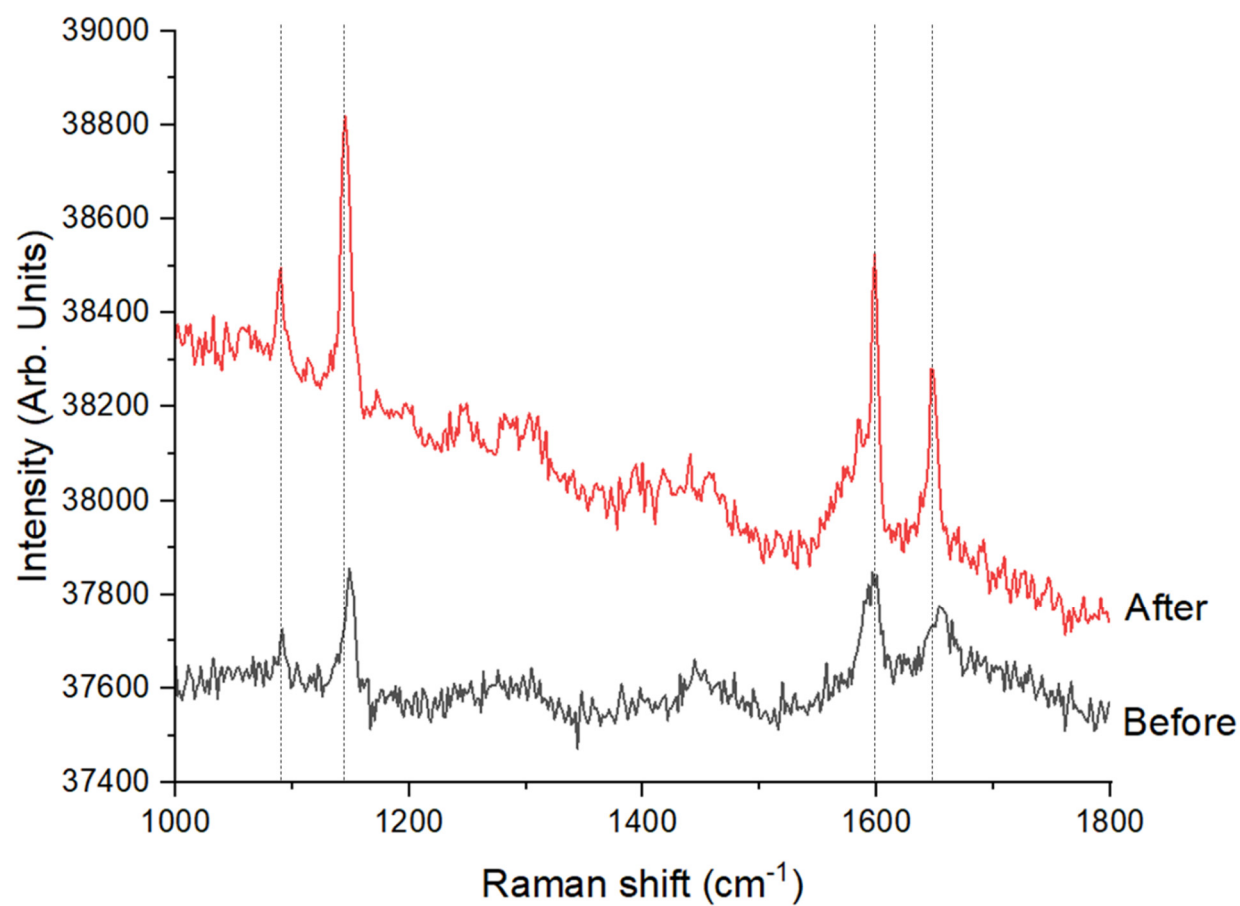

**Figure S2.** Mid-frequency Raman spectra of medium chain self-nanoemulsifying drug delivery system (MC-SNEDDS) before digestion (2 mins prior to lipase injection) and after digestion.
